# Supplementary material
Source: PubMed Central journal article supplement (PMC6360325)
Supplement: ddy387_supp.pdf [file ddy387_supp.pdf]

## Supplementary Materials

### Admixture Mapping Identifies Novel Loci for Obstructive Sleep Apnea in Hispanic/Latino Americans

Heming Wang<sup>1,2,3,4</sup>, Brian E. Cade<sup>2,3,4</sup>, Tamar Sofer<sup>2,3,5</sup>, Scott A. Sands<sup>2,3</sup>, Han Chen<sup>6,7</sup>, Sharon Browning<sup>5</sup>, Adrienne M. Stilp<sup>5</sup>, Tin L. Louie<sup>5</sup>, Timothy A. Thornton<sup>5</sup>, W. Craig Johnson<sup>5</sup>, Jennifer E. Below<sup>8</sup>, Matthew P. Conomos<sup>5</sup>, Daniel S. Evans<sup>9</sup>, Sina A Gharib<sup>10</sup>, Xiuqing Guo<sup>11</sup>, Alexis C. Frazier-Wood<sup>12</sup>, Hao Mei<sup>13</sup>, Kristine Yaffe<sup>14,15</sup>, Jose S. Loredó<sup>16</sup>, Alberto R. Ramos<sup>17</sup>, Elizabeth Barrett-Connor<sup>18</sup>, Sonia Ancoli-Israel<sup>19,20</sup>, Phyllis C. Zee<sup>21</sup>, Raanan Arens<sup>22</sup>, Neomi A. Shah<sup>23</sup>, Kent D. Taylor<sup>11</sup>, Gregory J. Tranah<sup>9</sup>, Katie L. Stone<sup>9</sup>, Craig L. Hanis<sup>6</sup>, James G Wilson<sup>24</sup>, Daniel J. Gottlieb<sup>2,3,25</sup>, Sanjay R. Patel<sup>2,3,26,27</sup>, Ken Rice<sup>5</sup>, Wendy S. Post<sup>28</sup>, Jerome I. Rotter<sup>11</sup>, Shamil R. Sunyaev<sup>4,29,30</sup>, Jianwen Cai<sup>31</sup>, Xihong Lin<sup>32</sup>, Shaun M. Purcell<sup>2,4,33,34</sup>, Cathy C. Laurie<sup>5</sup>, Richa Saxena<sup>2,3,4,35</sup>, Susan Redline<sup>2,3,26,\*</sup>, Xiaofeng Zhu<sup>1,\*</sup>

<sup>1</sup> Department of Population and Quantitative Health Sciences, Case Western Reserve University, Cleveland, OH 44106, USA

<sup>2</sup> Division of Sleep and Circadian Disorders, Brigham and Women's Hospital, Boston, MA 02115, USA

<sup>3</sup> Division of Sleep Medicine, Harvard Medical School, Boston, MA 02115, USA

<sup>4</sup> Broad Institute, Cambridge, MA 02142, USA

<sup>5</sup> Department of Biostatistics, University of Washington, Seattle, WA 98195, USA

<sup>6</sup> Human Genetics Center, Department of Epidemiology, Human Genetics and Environmental Sciences, School of Public Health, The University of Texas Health Science Center at Houston, Houston, TX 77030, USA

<sup>7</sup> Center for Precision Health, School of Public Health & School of Biomedical Informatics, The University of Texas Health Science Center at Houston, Houston, TX 77030, USA

<sup>8</sup> Vanderbilt Genetics Institute, Department of Medical Genetics, Vanderbilt University Medical Center, Nashville, TN 37232, USA

<sup>9</sup> California Pacific Medical Center Research Institute, San Francisco, CA 94158, USA

<sup>10</sup> Computational Medicine Core, Center for Lung Biology, UW Medicine Sleep Center, Division of Pulmonary and Critical Care Medicine, University of Washington, Seattle, WA 98195, USA

<sup>11</sup> Institute for Translational Genomics and Population Sciences, Los Angeles BioMedical Research Institute and Department of Pediatrics at Harbor-UCLA Medical Center, Torrance, CA 90502, USA

<sup>12</sup> Children's Nutrition Research Center, Baylor College of Medicine, Houston, TX 77030, USA

<sup>13</sup> Center of Biostatistics & Bioinformatics, University of Mississippi Medical Center, Jackson, MS 39216, USA

<sup>14</sup> Departments of Psychiatry and Neurology, University of California, San Francisco, San Francisco, CA, USA

<sup>15</sup> Department of Epidemiology and Biostatistics, University of California, San Francisco, CA, USA;

- <sup>16</sup> Division of Pulmonary Critical Care and Sleep Medicine, Department of Medicine, UC San Diego School of Medicine, La Jolla, CA 92093, USA
- <sup>17</sup> Department of Neurology, University of Miami Miller School of Medicine, Miami, FL 33136, USA
- <sup>18</sup> Department of Family and Preventive Medicine, University of California, San Diego, California 92093, USA
- <sup>19</sup> Departments of Medicine and Psychiatry, University of California, San Diego, CA 92093, USA
- <sup>20</sup> Department of Veterans Affairs San Diego Center of Excellence for Stress and Mental Health, San Diego, CA 92161, USA
- <sup>21</sup> Department of Neurology and Sleep Medicine Center, Northwestern University, Chicago, IL 60611, USA
- <sup>22</sup> The Children's Hospital at Montefiore, Division of Respiratory and Sleep Medicine, Albert Einstein College of Medicine, Bronx, NY 10467, USA
- <sup>23</sup> Division of Pulmonary, Critical Care and Sleep Medicine, Icahn School of Medicine at Mount Sinai, New York, NY 10029, USA
- <sup>24</sup> Physiology and Biophysics, University of Mississippi, Jackson, MS 39216, USA
- <sup>25</sup> VA Boston Healthcare System, Boston, MA 02132, USA
- <sup>26</sup> Division of Pulmonary, Critical Care, and Sleep Medicine, Beth Israel Deaconess Medical Center, Boston, MA 02215, USA
- <sup>27</sup> Division of Pulmonary, Allergy and Critical Care Medicine, University of Pittsburgh Medical Center, Pittsburgh, PA 15213, USA
- <sup>28</sup> Division of Cardiology, Johns Hopkins University, Baltimore, MD 21287, USA
- <sup>29</sup> Division of Genetics, Brigham and Women's Hospital, Boston, MA 02115, MA
- <sup>30</sup> Division of Medical Sciences, Harvard Medical School, Boston, MA 02115, USA
- <sup>31</sup> Department of Biostatistics, University of North Carolina-Chapel Hill, NC 27599, USA
- <sup>32</sup> Department of Biostatistics, Harvard T.H. Chan School of Public Health, Boston, MA 02115, USA
- <sup>33</sup> Department of Psychiatry, Brigham and Women's Hospital, Harvard Medical School, Boston, MA 02215, USA
- <sup>34</sup> Department of Psychiatry, Icahn School of Medicine at Mount Sinai, New York, NY 10029, USA
- <sup>35</sup> Center for Human Genetic Research and Department of Anesthesia, Pain, and Critical Care Medicine, Massachusetts General Hospital, Boston, MA 02114, USA

## Supplementary Methods

Replication analysis was conducted using independent European American, African American, and Hispanic/Latino American cohorts. The replication cohorts, chosen because they share one or all ancestries with the HCHS/SOL samples, were the Atherosclerosis Risk in Communities (ARIC), the Cleveland Family Study (CFS), the Cardiovascular Health Study (CHS), the Framingham Heart Study (FHS), the Jackson Heart Study (JHS), the Starr County Health Studies, the Multi-Ethnic Study of Atherosclerosis (MESA) and the Osteoporotic Fractures in Men Study (MrOS).

*The Atherosclerosis Risk in Communities (ARIC)* study is a community based study of atherosclerosis risk factors and cardiovascular outcomes. 11,478 European Americans and 4,266 African Americans were collected from 4 sites: Forsyth County, NC; Jackson, MI; Minneapolis, MN; and Washington County, MD at baseline exam between 19987 and 1989 (1). European Americans from the Maryland and Minnesota centers were recruited in the Sleep Heart Health Study (SHHS) to investigate the impact of sleep disordered breathing (2). Polysomnography data were collected using Compumedics PS-2 system (Compumedics Pty Ltd, Abbotsford, Australia). 1,432 participants genotyped by Affymetrix 6.0 array with available phenotypes were included in this study.

*The Cleveland Family Study (CFS)* is the largest family-based study of laboratory diagnosed sleep apnea patients and family members as well as neighborhood control families. 356 African-and European American families including 2,534 from northern Ohio were followed across five visits till 2006 (3). An Edentrace Type 3 home sleep apnea device was used (Eden Prairie, MN) to assess sleep apnea before 2000. 14-channel polysomnography (Compumedics E

series, Abbotsford, AU) were used in the last exam between 2000 and 2006 (4). This sample was genotyped by Affymetrix 6.0 and Illumina OmniExpress, Exome, and IBC chip arrays. 1,441 African- and European- Americans were included in this study.

*The Cardiovascular Health Study (CHS)* is a population-based study of factors of coronary heart disease and stroke risk factors in senior adults  $\geq 65$  years old from 1989 – 1999 (5). 5,201 European Americans and 687 African Americans were examined from four sites: Allegheny County, PA; Sacramento County, CA; Washington County, MD; and Winston-Salem, NC. Individuals from the first three centers enrolled in SHHS were assessed for polysomnography data. Samples were genotyped by Illumina CNV370, and/or Omni1M plus IBC genotypes. 185 African Americans and 731 European Americans with genotype and polysomnography data were obtained from dbGaP (pht003699.v1.p1).

*The Framingham Heart Study (FHS)* is a long period family-based cohort studying the risk factors and characteristics of cardiovascular disease (CVD) in Framingham, Massachusetts since 1948. The second-generation Offspring cohort of 5,124 individuals and their spouses was established in 1971 (6). A subset of them were enrolled in SHHS and screening for polysomnography by Compumedics PS-2 system (Compumedics Pty Ltd, Abbotsford, Australia). The Offspring cohort was genotyped by Affymetrix 500k and Illumina Omni 5M. 640 European Americans with genotypes and polysomnography were obtained from dbGaP (pht000395.v7.p8).

*The Jackson Heart Study (JHS)* is a African-American community-based cohort investigate the risk factors of cardiovascular diseases (7, 8). 5,306 participants were recruited from three counties MS (Hinds, Madison, and Rankin) of Jackson at baseline (2000-2004). An

ancillary sleep study associated with Exam 3 (2012-2016) was conducted measuring sleep apnea with the Embla Embletta Gold, a 14-channel device that includes an oximeter (Broomfield, CO). The ancillary sleep study occurred from 2012 – 2016, corresponding with Exam 3. Sleep questionnaire and additional anthropometry and phlebotomy were also collected. 496 individuals genotyped by Affymetrix 6.0 with available phenotypes were included for replication.

*The Multi-Ethnic Study of Atherosclerosis (MESA)* is a cohort study of risk effect of subclinical cardiovascular diseases in multiple ethnic groups (Asian, African American, European American, Hispanic/Latino American) (9). 6,814 participants aged from 45 to 84 were recruited from 6 communities: Baltimore MD, Chicago IL, Los Angeles CA, New York NY, Minneapolis/St. Paul MN, and Winston-Salem NC at baseline (2000). An ancillary sleep study of 2,060 individuals associated with Exam 5 (2010-2013) was conducted measuring in-home PSG, actigraphy, and a questionnaire adapted from the SHHS and HCHS sleep questionnaires. Unattended polysomnography was collected using a 15-channel monitor (Compumedics Somte System, Abbotsford, AU). African Americans, European Americans and Hispanic Latino Americans genotyped by Affymetrix 6.0 array were analyzed for SNP association replication. Gene expression data from monocytes of 619 individuals were further analyzed. Gene expression was measured using the Illumina HumanHT-12 v4 Expression BeadChip and Illumina Bead Array Reader followed by standard QC (10).

*The Osteoporotic Fractures in Men Study (MrOS)* is a cohort study of osteoporosis and fractures in older males (11, 12). Around 6,000 men aged  $\geq 65$  years were recruited from six medical centers in Birmingham AL, Minneapolis MN, Palo Alto CA, Monongahela Valley PA, Portland OR, and San Diego between 2000 and 2002. An ancillary sleep study of 3,135 individuals was conducted between 2003 and 2005. Unattended polysomnography was collected

using the Compumedics Safiro system (Abbotsford AU). Anthropometry and sleep questionnaires were also collected. 2,178 European Americans genotyped by Illumina Omi 1M array were included for replication.

*The Starr County Health Studies (Starr)* is a predominantly Mexican-American (97%) cohort examining the risk factors of diabetes in that Texas border county since 1981 (13, 14). Sleep apnea was assessed in 1,200 adults (ages between 30 and 90) using the WatchPAT-200 device (Itamar-Medical Ltd., Caesarea, Israel), with recording of finger pulse oximetry, actigraphy, body position, peripheral arterial tonometry, and snoring. The validation of WatchPAT using polysomnography has been demonstrated in previous publications. Additional questionnaire adapted from the HCHS sleep questionnaires was also collected. 782 individuals genotyped by Affymetrix 6.0 with available phenotypes were included for replication.

## References

1. The Atherosclerosis Risk in Communities (ARIC) Study: design and objectives. The ARIC investigators. *American journal of epidemiology* 1989; 129: 687-702.
2. Quan SF, Howard BV, Iber C, Kiley JP, Nieto FJ, O'Connor GT, Rapoport DM, Redline S, Robbins J, Samet JM, Wahl PW. The Sleep Heart Health Study: design, rationale, and methods. *Sleep* 1997; 20: 1077-1085.
3. Redline S, Tishler PV, Tosteson TD, Williamson J, Kump K, Browner I, Ferrette V, Krejci P. The familial aggregation of obstructive sleep apnea. *American journal of respiratory and critical care medicine* 1995; 151: 682-687.
4. Redline S, Schluchter MD, Larkin EK, Tishler PV. Predictors of longitudinal change in sleep-disordered breathing in a nonclinic population. *Sleep* 2003; 26: 703-709.
5. Fried LP, Borhani NO, Enright P, Furberg CD, Gardin JM, Kronmal RA, Kuller LH, Manolio TA, Mittelmark MB, Newman A, et al. The Cardiovascular Health Study: design and rationale. *Annals of epidemiology* 1991; 1: 263-276.
6. Feinleib M. The Framingham Study: sample selection, follow-up, and methods of analyses. *National Cancer Institute monograph* 1985; 67: 59-64.
7. Taylor HA, Jr., Wilson JG, Jones DW, Sarpong DF, Srinivasan A, Garrison RJ, Nelson C, Wyatt SB. Toward resolution of cardiovascular health disparities in African Americans: design and methods of the Jackson Heart Study. *Ethnicity & disease* 2005; 15: S6-4-17.
8. Wilson JG, Rotimi CN, Ekunwe L, Royal CD, Crump ME, Wyatt SB, Steffes MW, Adeyemo A, Zhou J, Taylor HA, Jr., Jaquish C. Study design for genetic analysis in the Jackson Heart Study. *Ethnicity & disease* 2005; 15: S6-30-37.
9. Bild DE, Bluemke DA, Burke GL, Detrano R, Diez Roux AV, Folsom AR, Greenland P, Jacob DR, Jr., Kronmal R, Liu K, Nelson JC, O'Leary D, Saad MF, Shea S, Szklo M, Tracy RP. Multi-Ethnic Study of Atherosclerosis: objectives and design. *American journal of epidemiology* 2002; 156: 871-881.
10. Liu Y, Ding J, Reynolds LM, Lohman K, Register TC, De La Fuente A, Howard TD, Hawkins GA, Cui W, Morris J, Smith SG, Barr RG, Kaufman JD, Burke GL, Post W, Shea S, McCall CE, Siscovick D, Jacobs DR, Jr., Tracy RP, Herrington DM, Hoeschele I. Methyloomics of gene expression in human monocytes. *Hum Mol Genet* 2013; 22: 5065-5074.
11. Orwoll E, Blank JB, Barrett-Connor E, Cauley J, Cummings S, Ensrud K, Lewis C, Cawthon PM, Marcus R, Marshall LM, McGowan J, Phipps K, Sherman S, Stefanick ML, Stone K. Design and baseline characteristics of the osteoporotic fractures in men (MrOS) study--a large observational study of the determinants of fracture in older men. *Contemporary clinical trials* 2005; 26: 569-585.
12. Mehra R, Stone KL, Blackwell T, Ancoli Israel S, Dam TT, Stefanick ML, Redline S, Osteoporotic Fractures in Men S. Prevalence and correlates of sleep-disordered breathing in older men: osteoporotic fractures in men sleep study. *Journal of the American Geriatrics Society* 2007; 55: 1356-1364.
13. Hanis CL, Ferrell RE, Barton SA, Aguilar L, Garza-Ibarra A, Tulloch BR, Garcia CA, Schull WJ. Diabetes among Mexican Americans in Starr County, Texas. *American journal of epidemiology* 1983; 118: 659-672.
14. Hanis CL, Redline S, Cade BE, Bell GI, Cox NJ, Below JE, Brown EL, Aguilar D. Beyond type 2 diabetes, obesity and hypertension: an axis including sleep apnea, left ventricular hypertrophy, endothelial dysfunction, and aortic stiffness among Mexican Americans in Starr County, Texas. *Cardiovascular diabetology* 2016; 15: 86.

## Supplementary Figures

Supplementary Figure 1. Admixture mapping analysis results of AHI across the genome.

A. Primary model adjusting for sex, age, age<sup>2</sup>, Age×sex, BMI, BMI<sup>2</sup>, five PCs and kinship coefficients.

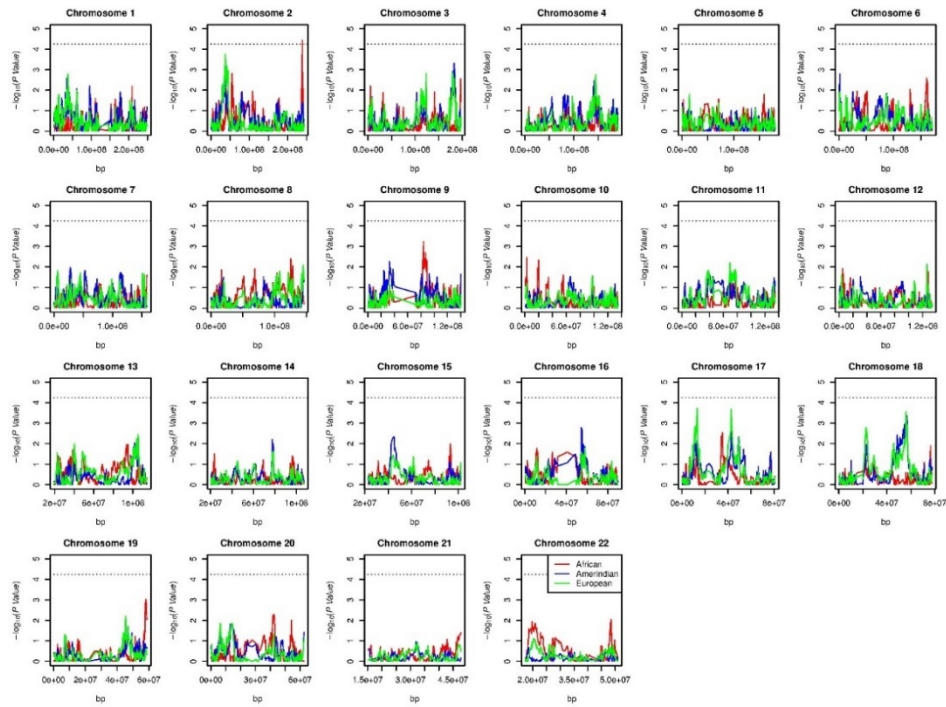

B. Secondary model adjusting for sampling weight, households, census blocks and covariates in A.

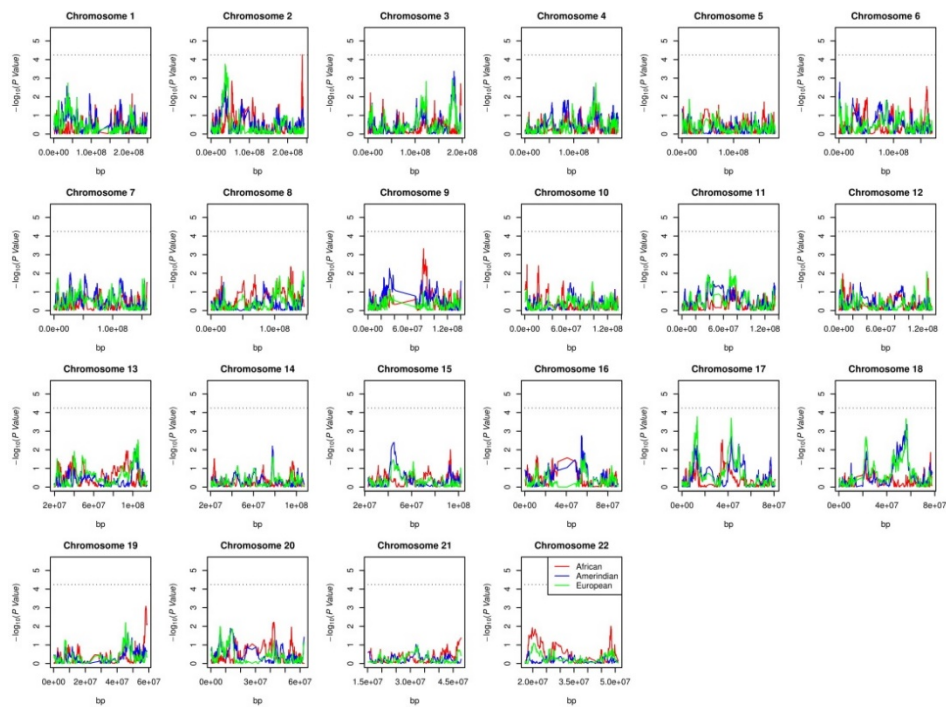



Supplementary Figure 2. Admixture mapping analysis results of average SaO<sub>2</sub> overnight.

A. Primary model adjusting for sex, age, age<sup>2</sup>, Age×sex, BMI, BMI<sup>2</sup>, five PCs and kinship coefficients.

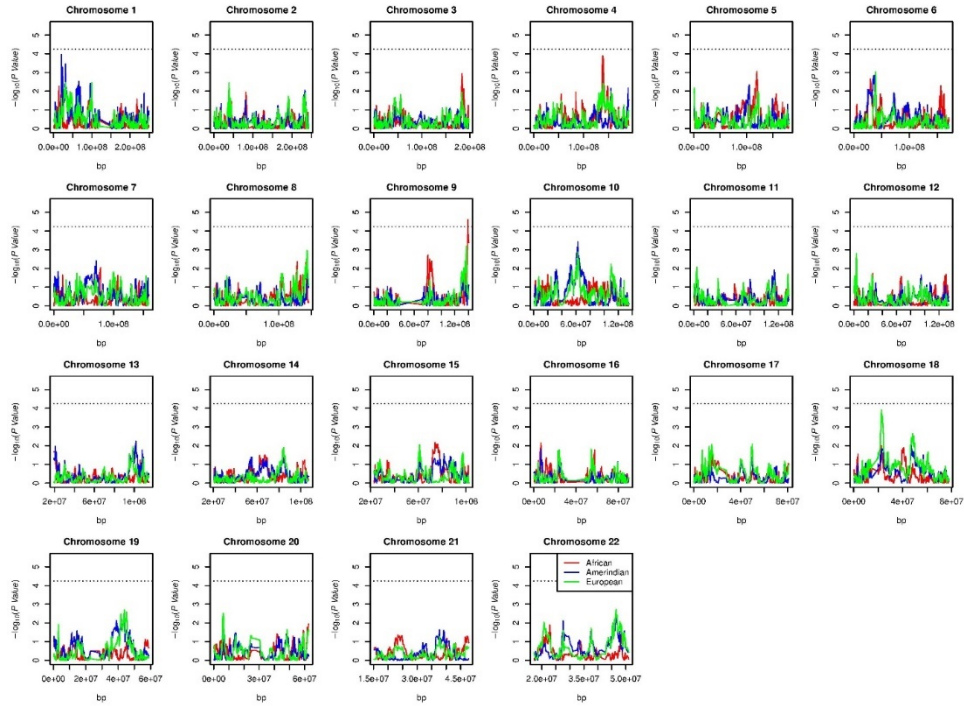

B. Secondary model adjusting for sampling weight, households, census blocks and covariates in A.

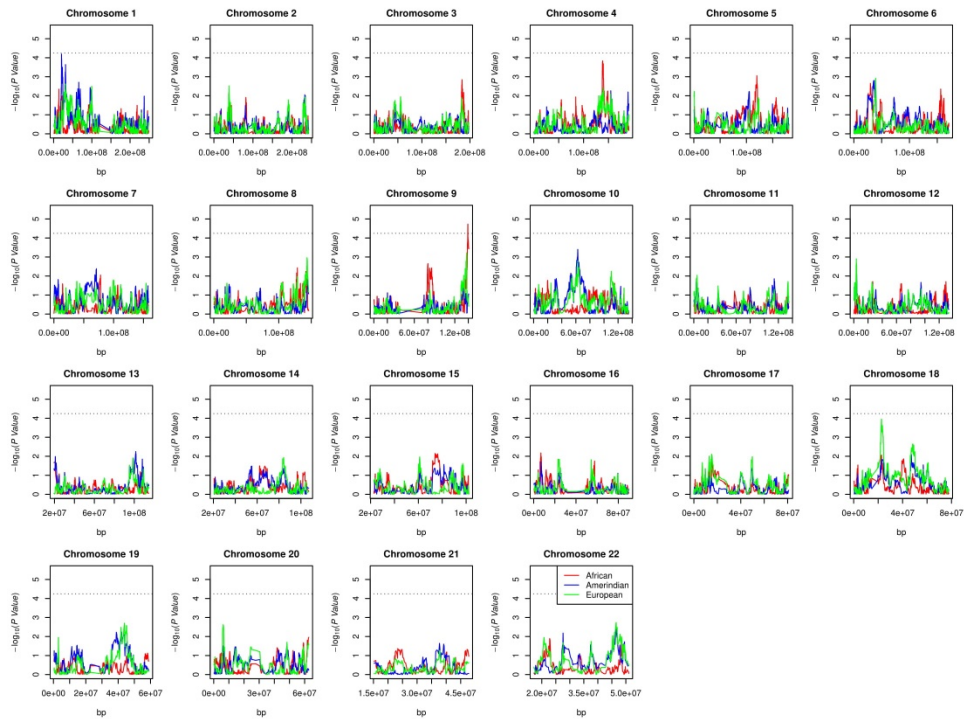

Supplementary Figure 3. Admixture mapping analysis results of percentage time SaO<sub>2</sub><90%.

A. Primary model adjusting for sex, age, age<sup>2</sup>, Age×sex, BMI, BMI<sup>2</sup>, five PCs and kinship coefficients.

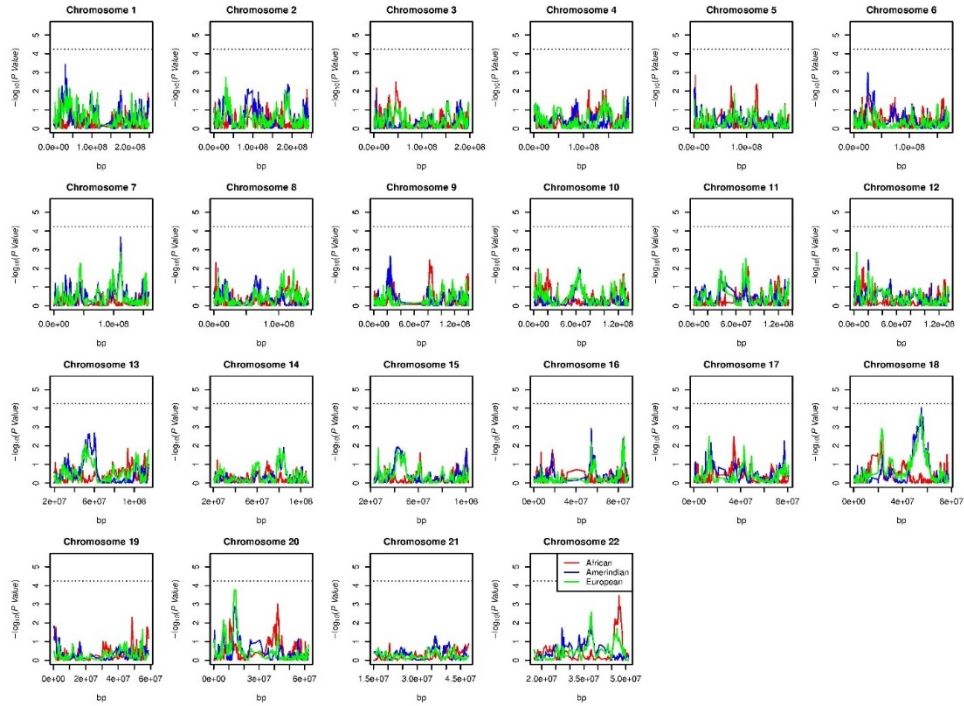

B. Secondary model adjusting for sampling weight, households, census blocks and covariates in A.

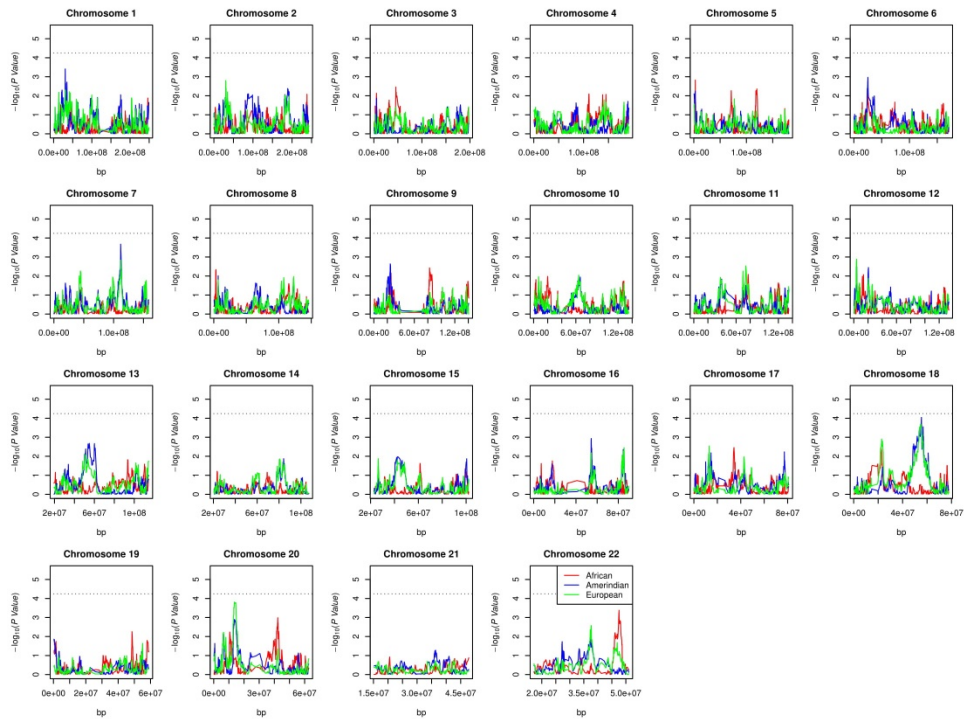

Supplementary Figure 4. Admixture mapping analysis results of average event duration.

A. Primary model adjusting for sex, age, age<sup>2</sup>, Age×sex, BMI, BMI<sup>2</sup>, five PCs and kinship coefficients.

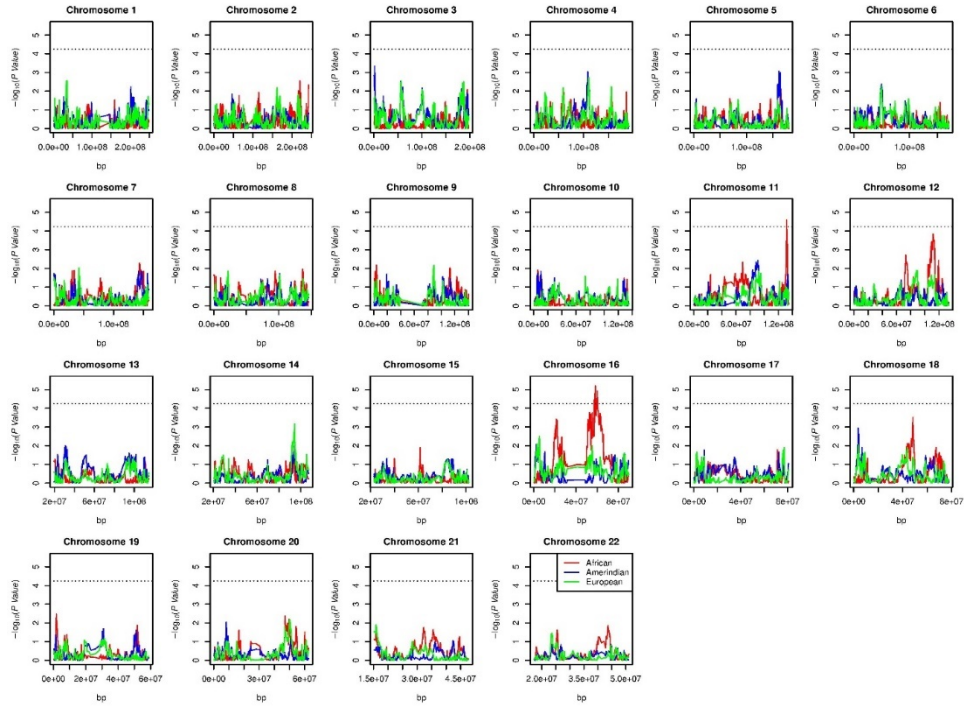

B. Secondary model adjusting for sampling weight, households, census blocks and covariates in A.

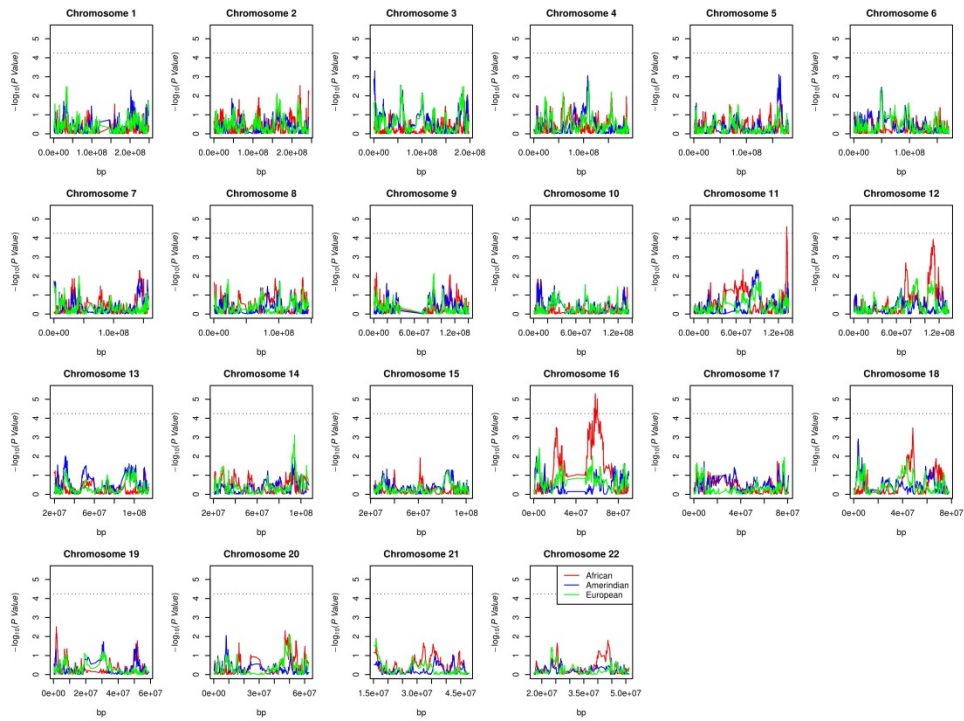

Supplementary Figure 5. Regional association plot of AHI at lincRNA *AC011286.1* on chromosome 2.

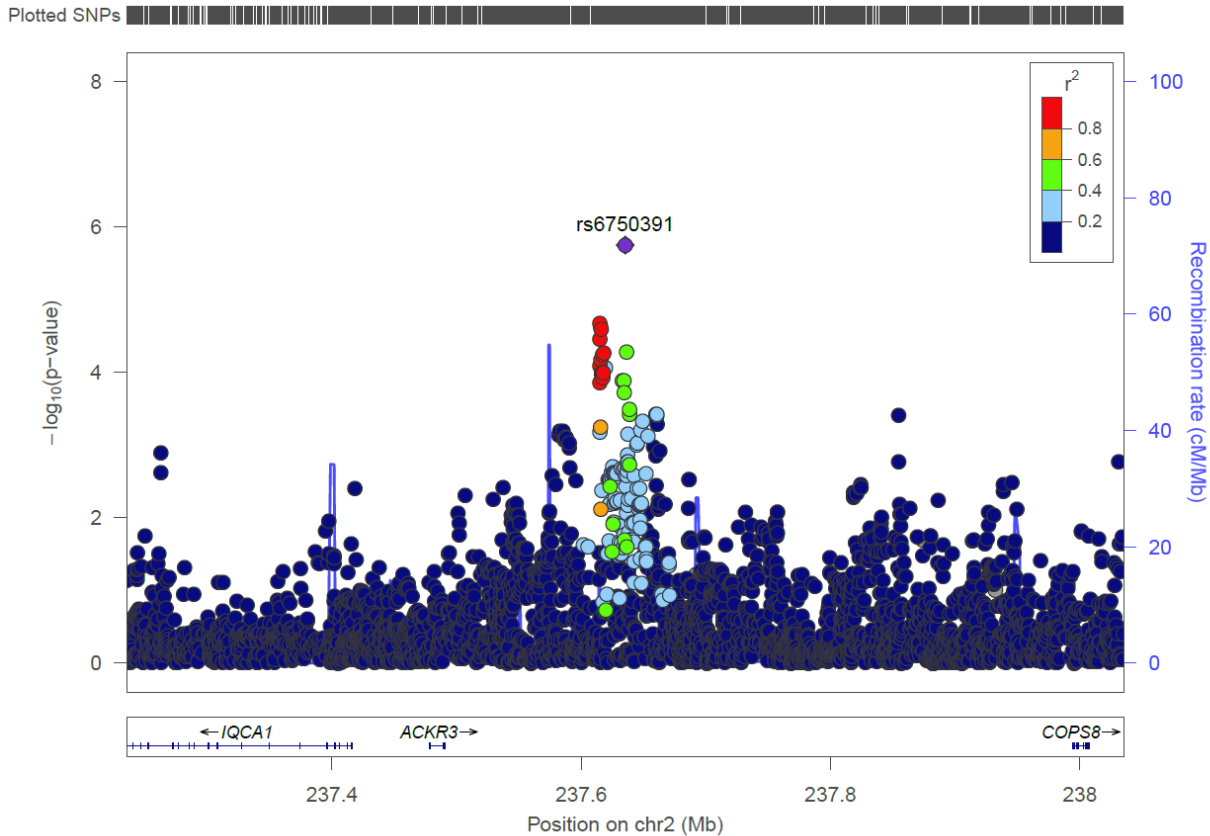

Supplementary Figure 6. Regional association plot of combined AHI and percentage time SaO<sub>2</sub><90% traits at gene *NARS/FECH* on chromosome 18.

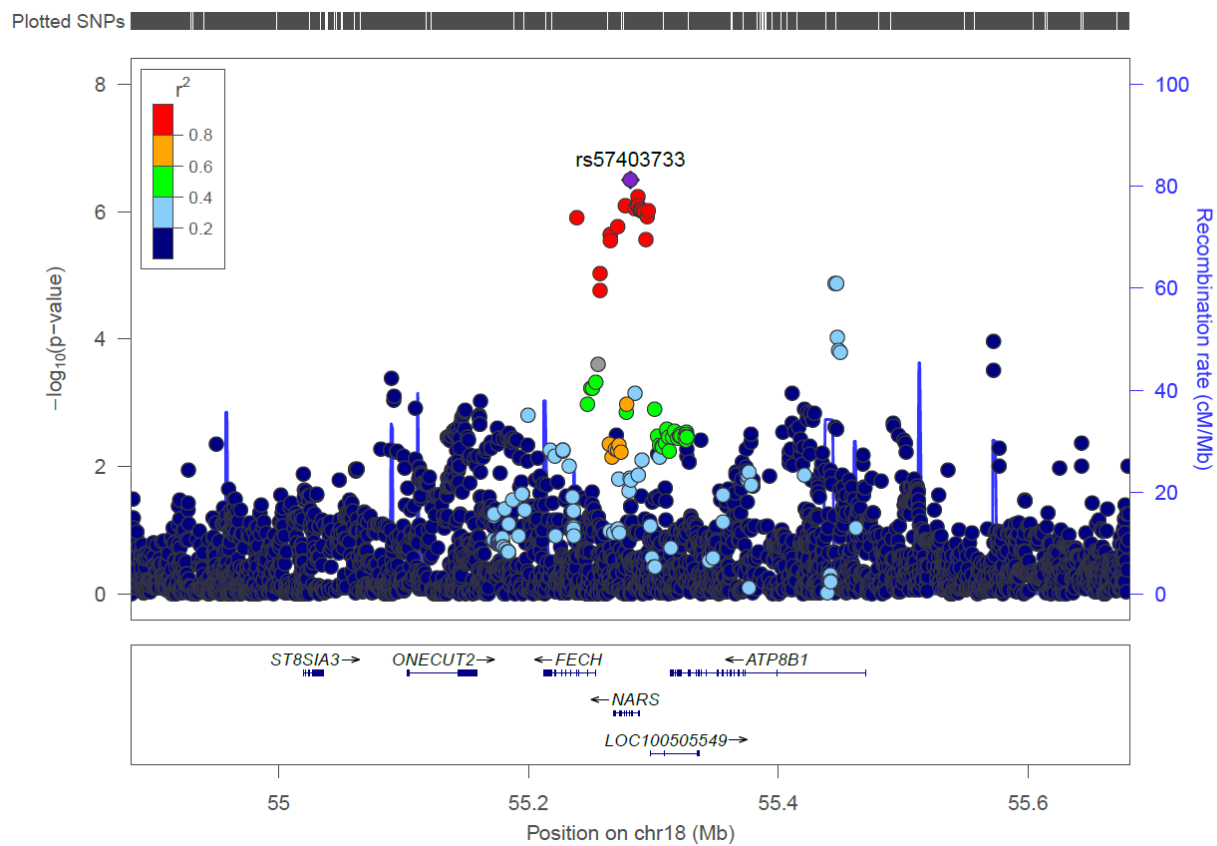

Supplementary Figure 7. Regional association plot of average event duration at lincRNA *RP11-96H17.1* on chromosome 16.

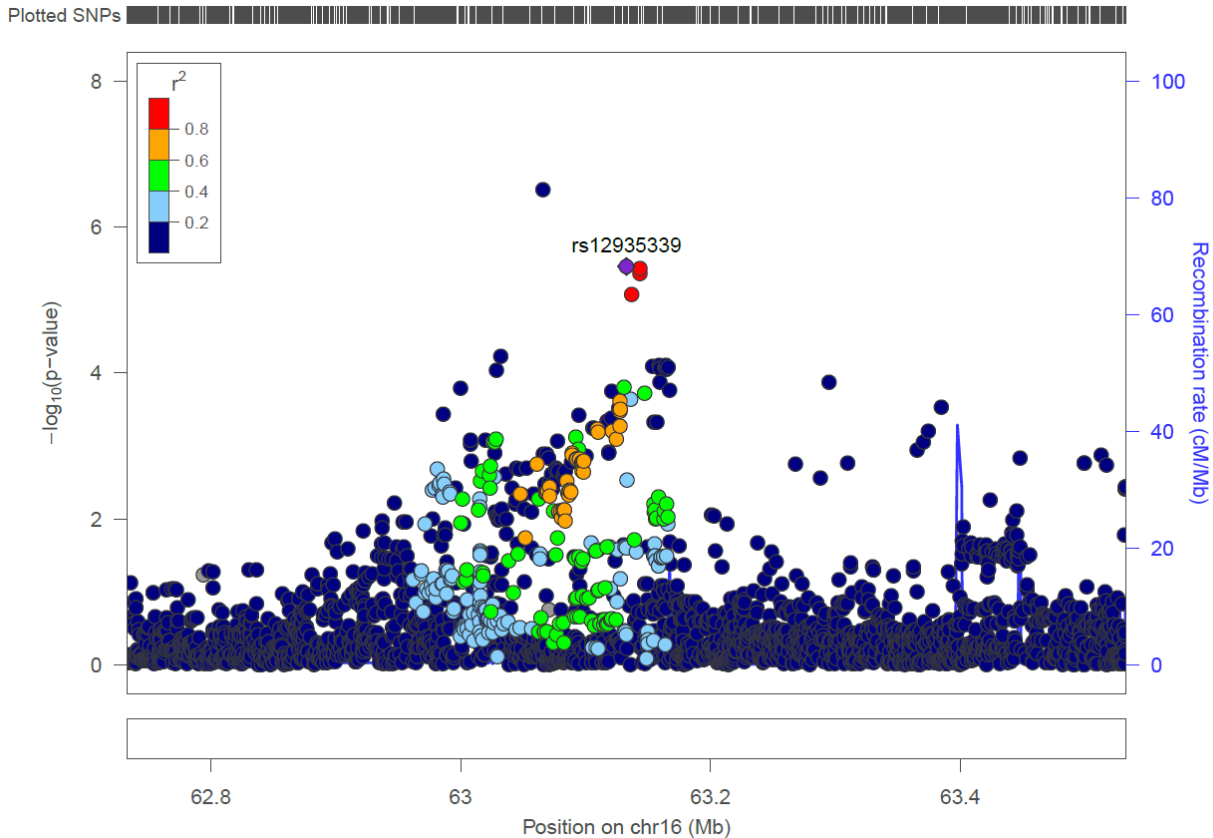

Supplementary Figure 8 Gene expression level in different tissues queried by GTEx.

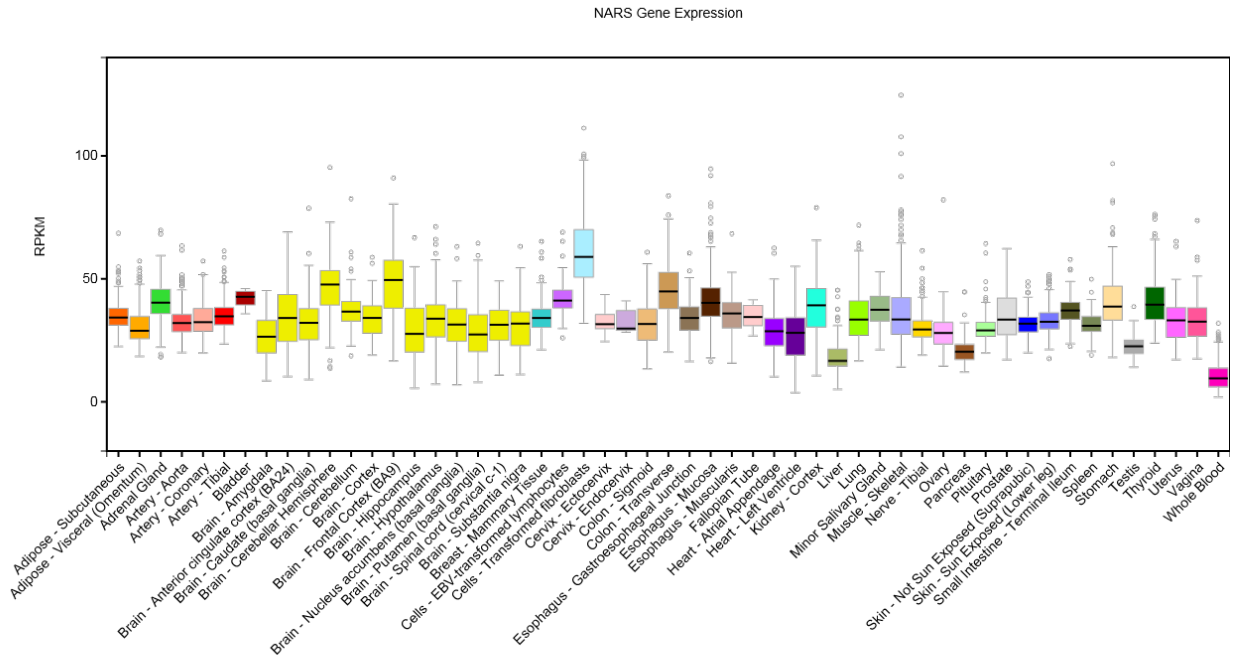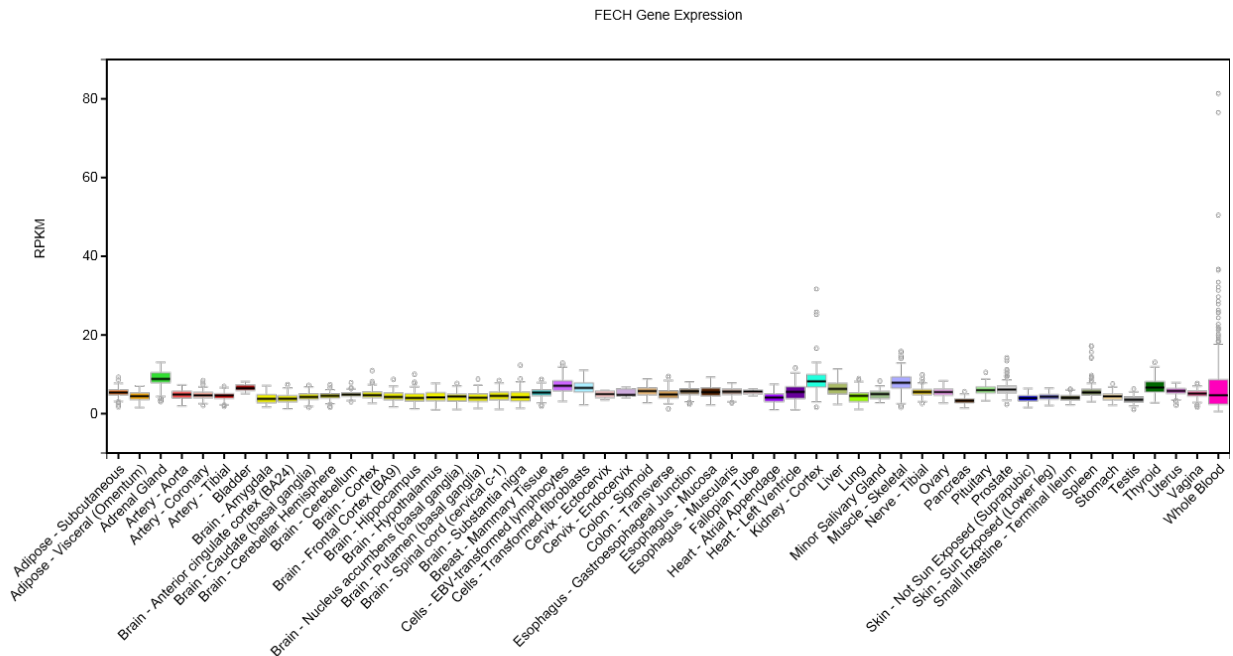

AC011286.1 Gene Expression

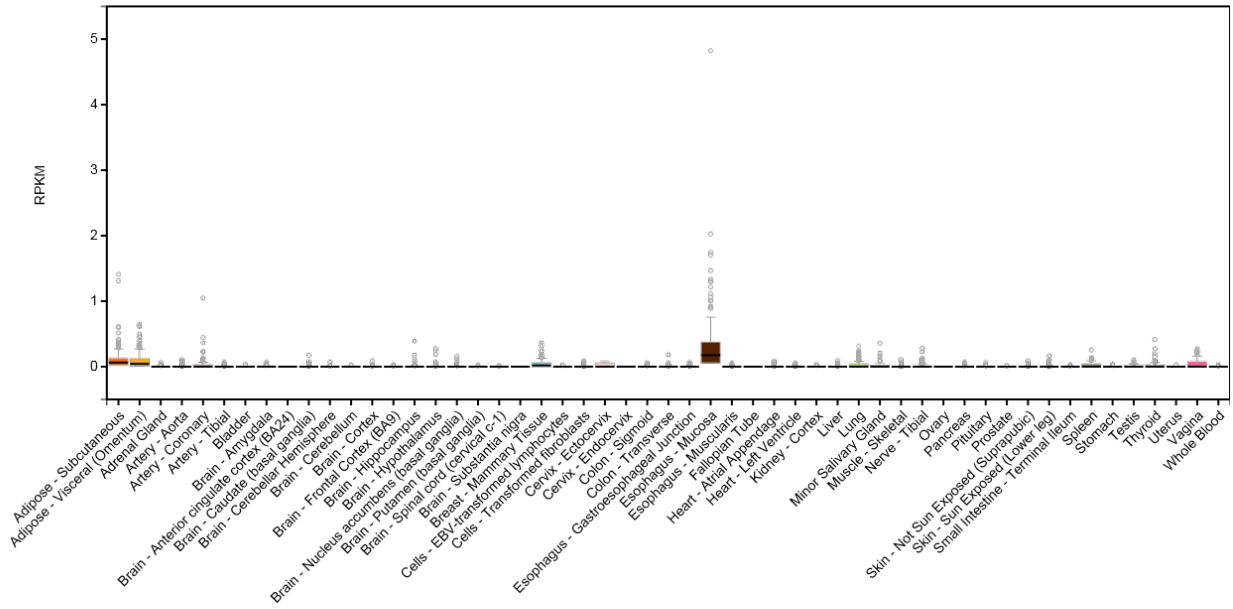

RP11-96H17.1 Gene Expression

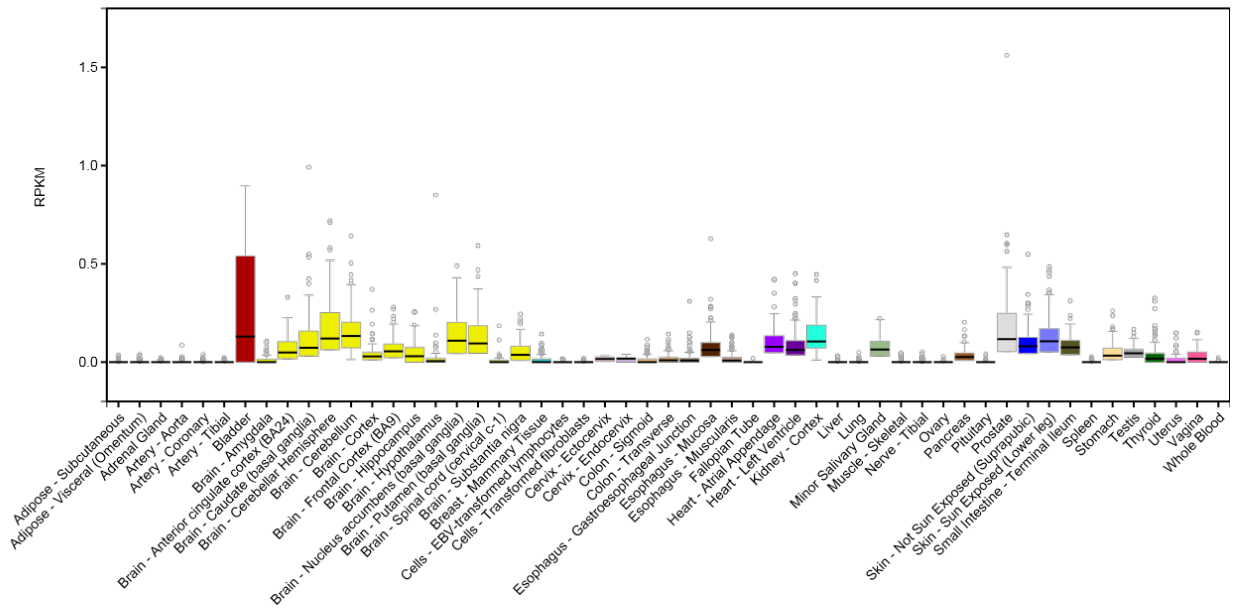



Supplementary Table 1. Pairwise correlations among OSA traits and other variables in the HCHS/SOL.

|                                               | <b>AHI</b>             | <b>Average SaO<sub>2</sub></b> | <b>Percentage time SaO<sub>2</sub>&lt;90%</b> | <b>Average event duration</b> |
|-----------------------------------------------|------------------------|--------------------------------|-----------------------------------------------|-------------------------------|
| <b>Average SaO<sub>2</sub></b>                | -0.69<br>(-0.70,-0.68) |                                |                                               |                               |
| <b>Percentage time SaO<sub>2</sub>&lt;90%</b> | 0.77<br>(0.76,0.78)    | -0.72<br>(-0.73,-0.71)         |                                               |                               |
| <b>Average event duration</b>                 | 0.07<br>(0.05,0.09)    | -0.04<br>(-0.064,-0.02)        | 0.09<br>(0.06,0.11)                           |                               |
| <b>Age</b>                                    | 0.24<br>(0.22,0.25)    | -0.30<br>(-0.32,-0.28)         | 0.14<br>(0.12,0.16)                           | 0.18<br>(0.15,0.20)           |
| <b>Male</b>                                   | 0.16<br>(0.14,0.18)    | -0.15<br>(-0.16,-0.13)         | 0.10<br>(0.08,0.12)                           | 0.12<br>(0.10,0.14)           |
| <b>BMI</b>                                    | 0.30<br>(0.28,0.32)    | -0.28<br>(-0.30,-0.27)         | 0.22<br>(0.20,0.24)                           | -0.15<br>(-0.17,-0.13)        |
| <b>African Ancestry</b>                       | -0.01<br>(-0.03, 0.01) | 0.02<br>(0.00,0.04)            | -0.01<br>(-0.02,0.01)                         | -0.06<br>(-0.08,-0.04)        |
| <b>Amerindian Ancestry</b>                    | -0.04<br>(-0.05,-0.02) | 0.05<br>(0.03,0.07)            | -0.02<br>(-0.04,0.00)                         | 0.03<br>(0.01,0.05)           |
| <b>European Ancestry</b>                      | 0.05<br>(0.03,0.07)    | -0.07<br>(-0.09,-0.05)         | 0.03<br>(0.01,0.05)                           | 0.01<br>(-0.01,0.03)          |

Supplementary Table 2. Associations between each OSA trait with African and Amerindian global ancestries in one regression model, adjusting for sex, age, age<sup>2</sup>, age×sex, BMI, and BMI<sup>2</sup>.

|                                             | African Ancestry                            |        |                       | Amerindian Ancestry                         |        |                       |
|---------------------------------------------|---------------------------------------------|--------|-----------------------|---------------------------------------------|--------|-----------------------|
|                                             | Estimate<br>per 1%<br>change of<br>ancestry | SE     | P                     | Estimate<br>per 1%<br>change of<br>ancestry | SE     | P                     |
| AHI                                         | -0.0009                                     | 0.0006 | 0.105                 | 0.0002                                      | 0.0004 | 0.538                 |
| Average SaO <sub>2</sub>                    | 0.0022                                      | 0.0006 | 3.21×10 <sup>-4</sup> | 0.0012                                      | 0.0004 | 0.003                 |
| Percentage<br>time<br>SaO <sub>2</sub> <90% | 0.0001                                      | 0.0006 | 0.836                 | -0.0001                                     | 0.0004 | 0.738                 |
| Average<br>event<br>duration                | -0.002                                      | 0.0007 | 8.27×10 <sup>-3</sup> | 0.0023                                      | 0.0005 | 4.79×10 <sup>-6</sup> |

Supplementary Table 3. Significant admixture mapping regions ( $P < 10^{-3}$ ).

| Trait                                         | Position (Mb)          | Ancestry          | Est           | SE           | P*              |
|-----------------------------------------------|------------------------|-------------------|---------------|--------------|-----------------|
| <b>AHI</b>                                    | 2:36.76-38.72          | European          | 0.05          | 0.013        | 1.77E-04        |
| N=10242                                       | <b>2:237.54-238.39</b> | <b>African</b>    | <b>-0.079</b> | <b>0.019</b> | <b>3.70E-05</b> |
|                                               | 3:182.34-182.54        | Amerindian        | -0.052        | 0.015        | 4.83E-04        |
|                                               | 17:12.55-13.38         | European          | 0.049         | 0.013        | 1.88E-04        |
|                                               | 17:42.55-42.75         | European          | -0.048        | 0.013        | 2.06E-04        |
|                                               | <b>18:55.82-56.17</b>  | <b>European</b>   | <b>0.048</b>  | <b>0.013</b> | <b>2.74E-04</b> |
|                                               | <b>18:56.68-56.88</b>  | <b>Amerindian</b> | <b>-0.052</b> | <b>0.015</b> | <b>4.46E-04</b> |
| <b>Average SaO<sub>2</sub></b>                | 1:20.48-31.29          | Amerindian        | 0.063         | 0.016        | 1.07E-04        |
| N=10267                                       | 4:137.49-139.75        | African           | 0.079         | 0.021        | 1.29E-04        |
|                                               | 5:119.80-120.00        | African           | 0.071         | 0.021        | 8.85E-04        |
|                                               | 6:39.13-39.33          | European          | 0.046         | 0.014        | 9.20E-04        |
|                                               | 9:137.20-137.62        | European          | 0.048         | 0.014        | 6.28E-04        |
|                                               | 10:62.50-62.79         | Amerindian        | -0.057        | 0.016        | 3.79E-04        |
|                                               | 18:22.12-24.19         | European          | -0.055        | 0.014        | 1.22E-04        |
| <b>Percentage time SaO<sub>2</sub>&lt;90%</b> | 1:30.15-30.60          | Amerindian        | -0.054        | 0.015        | 3.82E-04        |
| N=10267                                       | 7:111.59-112.47        | Amerindian        | 0.056         | 0.015        | 2.12E-04        |
|                                               | <b>18:51.81-57.12</b>  | <b>Amerindian</b> | <b>-0.058</b> | <b>0.015</b> | <b>9.15E-05</b> |
|                                               | <b>18:53.54-56.17</b>  | <b>European</b>   | <b>0.049</b>  | <b>0.013</b> | <b>2.01E-04</b> |
| <b>Average event duration</b>                 | 3:1.70-1.90            | Amerindian        | -0.067        | 0.019        | 4.60E-04        |
| N=8862                                        | 4:108.29-108.49        | Amerindian        | -0.065        | 0.02         | 8.97E-04        |
|                                               | 5:161.67-161.96        | Amerindian        | 0.065         | 0.02         | 8.71E-04        |
|                                               | 12:108.22-113.79       | African           | 0.097         | 0.025        | 1.43E-04        |
|                                               | 14:94.14-94.34         | European          | -0.057        | 0.017        | 6.86E-04        |
|                                               | 16:21.18-22.11         | African           | -0.09         | 0.025        | 3.77E-04        |
|                                               | <b>16:51.14-64.12</b>  | <b>African</b>    | <b>-0.113</b> | <b>0.025</b> | <b>6.42E-06</b> |
|                                               | 18:47.99-48.44         | African           | 0.09          | 0.025        | 3.12E-04        |

\* Minimum P-value in each region.

Supplementary Table 4. All significant SNPs ( $p < 8 \times 10^{-6}$ ) under the candidate regions associated with OSA traits in HCHS/SOL.

| SNP        | B37 position | Alleles (E/A) | EAF   | Trait                 | $\beta$ (se)   | P                     | Combined P*           |
|------------|--------------|---------------|-------|-----------------------|----------------|-----------------------|-----------------------|
| rs6750391  | 2:237635300  | T/C           | 0.898 | AHI                   | 0.090 (0.019)  | $1.78 \times 10^{-6}$ |                       |
| rs56874481 | 2:237648772  | TTG/T         | 0.133 | AHI                   | -0.081 (0.018) | $4.76 \times 10^{-6}$ |                       |
| rs74021948 | 16:63065908  | A/C           | 0.984 | Duration              | 0.302 (0.059)  | $3.07 \times 10^{-7}$ |                       |
| rs12935339 | 16:63132772  | G/A           | 0.308 | Duration              | -0.074 (0.016) | $3.44 \times 10^{-6}$ |                       |
| rs34398460 | 16:63133581  | T/TA          | 0.339 | Duration              | -0.076 (0.016) | $3.58 \times 10^{-6}$ |                       |
| rs11647443 | 16:63143791  | A/G           | 0.299 | Duration              | -0.075 (0.016) | $3.71 \times 10^{-6}$ |                       |
| rs57403733 | 18:55281709  | G/A           | 0.803 | AHI                   | 0.066 (0.015)  | $1.47 \times 10^{-5}$ | $3.20 \times 10^{-7}$ |
|            |              |               |       | SaO <sub>2</sub> <90% | 0.078 (0.015)  | $3.98 \times 10^{-7}$ |                       |
| rs388644   | 18:55287739  | A/C           | 0.237 | AHI                   | -0.059 (0.014) | $1.53 \times 10^{-5}$ | $5.95 \times 10^{-7}$ |
|            |              |               |       | SaO <sub>2</sub> <90% | -0.068 (0.014) | $1.16 \times 10^{-6}$ |                       |
| rs72627250 | 18:55277787  | T/C           | 0.787 | AHI                   | 0.062 (0.015)  | $2.25 \times 10^{-5}$ | $7.98 \times 10^{-7}$ |
|            |              |               |       | SaO <sub>2</sub> <90% | 0.072 (0.015)  | $1.29 \times 10^{-6}$ |                       |
| rs3745063  | 18:55287527  | C/T           | 0.787 | AHI                   | 0.062 (0.015)  | $1.97 \times 10^{-5}$ | $8.02 \times 10^{-7}$ |
|            |              |               |       | SaO <sub>2</sub> <90% | 0.071 (0.015)  | $1.50 \times 10^{-6}$ |                       |
| rs388644   | 18:55287739  | A/T           | 0.787 | AHI                   | 0.062 (0.015)  | $1.98 \times 10^{-5}$ | $8.07 \times 10^{-7}$ |
|            |              |               |       | SaO <sub>2</sub> <90% | 0.071 (0.015)  | $1.51 \times 10^{-6}$ |                       |
| rs56687381 | 18:55290397  | AG/A          | 0.768 | AHI                   | 0.060 (0.014)  | $1.62 \times 10^{-5}$ | $8.77 \times 10^{-7}$ |
|            |              |               |       | SaO <sub>2</sub> <90% | 0.067 (0.014)  | $2.17 \times 10^{-6}$ |                       |
| rs12458303 | 18:55285288  | C/A           | 0.786 | AHI                   | 0.061 (0.015)  | $2.82 \times 10^{-5}$ | $9.09 \times 10^{-7}$ |
|            |              |               |       | SaO <sub>2</sub> <90% | 0.071 (0.015)  | $1.26 \times 10^{-6}$ |                       |
| rs72627251 | 18:55289415  | T/C           | 0.768 | AHI                   | 0.060 (0.014)  | $1.75 \times 10^{-5}$ | $9.26 \times 10^{-7}$ |
|            |              |               |       | SaO <sub>2</sub> <90% | 0.067 (0.014)  | $2.20 \times 10^{-6}$ |                       |
| rs59479795 | 18:55290771  | C/G           | 0.787 | AHI                   | 0.062 (0.015)  | $1.97 \times 10^{-5}$ | $9.28 \times 10^{-7}$ |
|            |              |               |       | SaO <sub>2</sub> <90% | 0.071 (0.015)  | $1.95 \times 10^{-6}$ |                       |
| rs72627253 | 18:55296033  | A/T           | 0.787 | AHI                   | 0.064 (0.015)  | $1.43 \times 10^{-5}$ | $9.55 \times 10^{-7}$ |
|            |              |               |       | SaO <sub>2</sub> <90% | 0.070 (0.015)  | $2.88 \times 10^{-6}$ |                       |
| rs28555130 | 18:55290092  | C/G           | 0.768 | AHI                   | 0.060 (0.014)  | $1.76 \times 10^{-5}$ | $9.81 \times 10^{-7}$ |
|            |              |               |       | SaO <sub>2</sub> <90% | 0.067 (0.014)  | $2.42 \times 10^{-6}$ |                       |
| rs12454523 | 18:55292454  | C/T           | 0.787 | AHI                   | 0.063 (0.015)  | $1.99 \times 10^{-5}$ | $1.00 \times 10^{-6}$ |
|            |              |               |       | SaO <sub>2</sub> <90% | 0.070 (0.015)  | $2.20 \times 10^{-6}$ |                       |
| rs12454416 | 18:55292605  | G/A           | 0.787 | AHI                   | 0.063 (0.015)  | $2.01 \times 10^{-5}$ | $1.01 \times 10^{-6}$ |
|            |              |               |       | SaO <sub>2</sub> <90% | 0.070 (0.015)  | $2.22 \times 10^{-6}$ |                       |
| rs72627252 | 18:55295314  | A/G           | 0.212 | AHI                   | 0.063 (0.015)  | $2.26 \times 10^{-5}$ | $1.22 \times 10^{-6}$ |
|            |              |               |       | SaO <sub>2</sub> <90% | 0.070 (0.015)  | $2.74 \times 10^{-6}$ |                       |
| rs2272783  | 18:55238820  | A/G           | 0.788 | AHI                   | 0.058 (0.015)  | $6.78 \times 10^{-5}$ | $1.24 \times 10^{-6}$ |
|            |              |               |       | SaO <sub>2</sub> <90% | 0.073 (0.015)  | $8.06 \times 10^{-7}$ |                       |
| rs78641697 | 18:55271627  | A/C           | 0.806 | AHI                   | 0.061 (0.015)  | $5.80 \times 10^{-5}$ | $1.72 \times 10^{-6}$ |
|            |              |               |       | SaO <sub>2</sub> <90% | 0.074 (0.015)  | $1.76 \times 10^{-6}$ |                       |
| rs72627249 | 18:55265698  | T/C           | 0.802 | AHI                   | 0.060 (0.015)  | $6.29 \times 10^{-5}$ | $2.28 \times 10^{-6}$ |
|            |              |               |       | SaO <sub>2</sub> <90% | 0.072 (0.015)  | $2.68 \times 10^{-6}$ |                       |
| rs8095804  | 18:55294197  | C/G           | 0.76  | AHI                   | 0.058 (0.014)  | $2.51 \times 10^{-5}$ | $2.74 \times 10^{-6}$ |
|            |              |               |       | SaO <sub>2</sub> <90% | 0.062 (0.014)  | $1.00 \times 10^{-5}$ |                       |

|            |             |       |       |                       |                |                       |                       |
|------------|-------------|-------|-------|-----------------------|----------------|-----------------------|-----------------------|
| rs4940483  | 18:55265856 | C/G   | 0.198 | AHI                   | -0.060 (0.015) | $7.70 \times 10^{-5}$ | $2.90 \times 10^{-6}$ |
|            |             |       |       | SaO <sub>2</sub> <90% | -0.071 (0.014) | $3.30 \times 10^{-6}$ |                       |
| rs10559003 | 18:55295414 | CTT/C | 0.76  | AHI                   | 0.058 (0.014)  | $2.68 \times 10^{-5}$ | $3.07 \times 10^{-6}$ |
|            |             |       |       | SaO <sub>2</sub> <90% | 0.062 (0.014)  | $1.15 \times 10^{-6}$ |                       |

AHI: apnea hypopnea index

Duration: average respiratory event duration

SaO<sub>2</sub><90%: percentage time SaO<sub>2</sub><90%

\*For variants on chromosome 18 associated with both AHI and Per90, we performed CPASSOC to combine the effect of both traits.

Supplementary Table 5. Variants annotation queried from Haploreg.

| Variant                    | Ref | Alt | AFR Freq of Alt | AMR Freq of Alt | EUR freq of Alt | Promoter histone marks | Enhancer   | DNase      | Proteins bound   | Motifs changed    | GRASP QTL hits | Selected eQTLhits | GENCODE genes           | dbSNP func annot |
|----------------------------|-----|-----|-----------------|-----------------|-----------------|------------------------|------------|------------|------------------|-------------------|----------------|-------------------|-------------------------|------------------|
| <a href="#">rs6750391</a>  | T   | C   | 0.51            | 0.07            | 0.05            |                        | KID        |            |                  | SRF               |                |                   | 6.7kb 5' of AC011286.1  |                  |
| <a href="#">rs56874481</a> | TGT | T   |                 |                 |                 |                        | BLD, HRT   |            |                  |                   |                |                   | AC011286.1              |                  |
| <a href="#">rs74021948</a> | A   | C   | 0.09            | 0.01            | 0               |                        |            |            |                  | Cdx,FAC1,Hmbox1   |                |                   | 25kb 3' of RP11-96H17.1 |                  |
| <a href="#">rs12935339</a> | G   | A   | 0.29            | 0.7             | 0.75            |                        |            |            |                  | 5 altered motifs  |                | 3 hits            | RP11-96H17.1            |                  |
| <a href="#">rs34398460</a> | T   | TA  |                 |                 |                 |                        |            |            |                  | 12 altered motifs |                |                   | RP11-96H17.1            |                  |
| <a href="#">rs11647443</a> | A   | G   | 0.29            | 0.71            | 0.76            |                        |            |            |                  | 4 altered motifs  |                | 3 hits            | RP11-96H17.1            |                  |
| <a href="#">rs57403733</a> | G   | A   | 0.01            | 0.21            | 0.04            |                        |            |            |                  | Pbx3,VDR          |                | 1 hit             | NARS                    | intronic         |
| <a href="#">rs388644</a>   | A   | C,T | 0.85            | 0.98            | 1               | 12 tissues             | 17 tissues |            |                  |                   |                |                   | NARS                    | intronic         |
| <a href="#">rs72627250</a> | T   | C   | 0.01            | 0.23            | 0.07            |                        |            |            |                  | HEN1,Nkx2,Tel2    |                | 1 hit             | NARS                    | intronic         |
| <a href="#">rs3745063</a>  | C   | T   | 0.01            | 0.23            | 0.07            | 5 tissues              | 14 tissues | MUS        |                  | Irf               | 1 hit          | 3 hits            | NARS                    | intronic         |
| <a href="#">rs56687381</a> | AG  | A   | 0.1             | 0.24            | 0.08            | SKIN                   | 6 tissues  | BLD,OVRY   |                  | AhR,Zbtb3         |                | 1 hit             | 1.2kb 5' of NARS        |                  |
| <a href="#">rs12458303</a> | C   | A   | 0.01            | 0.23            | 0.07            |                        | BLD        |            |                  | 5 altered motifs  |                | 1 hit             | NARS                    | intronic         |
| <a href="#">rs72627251</a> | T   | C   | 0.1             | 0.23            | 0.08            | 24 tissues             |            | 53 tissues | 4 bound proteins | SMC3              |                | 1 hit             | 237bp 5' of NARS        |                  |
| <a href="#">rs59479795</a> | C   | G   | 0.01            | 0.23            | 0.07            |                        | BRST       | BLD,MUS    |                  | HMG-IY            |                | 1 hit             | 1.6kb 5' of NARS        |                  |

| Variant                    | Ref | Alt | AFR freq | AMR freq | EUR freq | Promoter histone marks | Enhancer   | DNase      | Proteins bound | Motifs changed    | GRASP QTL hits | Selected eQTLhits | GENCODE genes    | dbSNP func annot |
|----------------------------|-----|-----|----------|----------|----------|------------------------|------------|------------|----------------|-------------------|----------------|-------------------|------------------|------------------|
| <a href="#">rs72627253</a> | A   | T   | 0.02     | 0.22     | 0.07     |                        | VAS        |            |                | 8 altered motifs  |                | 1 hit             | 6.9kb 5' of NARS |                  |
| <a href="#">rs28555130</a> | C   | G   | 0.1      | 0.23     | 0.08     | 13 tissues             | 13 tissues | KID        |                | 5 altered motifs  |                | 1 hit             | 914bp 5' of NARS |                  |
| <a href="#">rs12454523</a> | C   | T   | 0.01     | 0.23     | 0.07     |                        | 4 tissues  | 21 tissues | TCF4           |                   |                | 3 hits            | 3.3kb 5' of NARS |                  |
| <a href="#">rs12454416</a> | G   | A   | 0.01     | 0.23     | 0.07     |                        | BRN        | SKIN       | TCF4           | 4 altered motifs  |                | 1 hit             | 3.4kb 5' of NARS |                  |
| <a href="#">rs72627252</a> | A   | G   | 0.01     | 0.23     | 0.07     |                        | 11 tissues | ESDR,SKIN  |                | 8 altered motifs  |                | 1 hit             | 6.1kb 5' of NARS |                  |
| <a href="#">rs2272783</a>  | A   | G   | 0.02     | 0.22     | 0.05     |                        |            |            |                | RFX5              | 2 hits         | 21 hits           | FECH             | intronic         |
| <a href="#">rs78641697</a> | A   | C   | 0.01     | 0.19     | 0.03     |                        | BLD        |            |                | 10 altered motifs |                | 1 hit             | NARS             | intronic         |
| <a href="#">rs72627249</a> | T   | C   | 0.01     | 0.2      | 0.04     |                        |            |            |                |                   |                | 2 hits            | 2.2kb 3' of NARS |                  |
| <a href="#">rs8095804</a>  | C   | G   | 0.12     | 0.24     | 0.08     |                        | LIV        | BLD        |                |                   | 1 hit          | 1 hit             | 5kb 5' of NARS   |                  |
| <a href="#">rs4940483</a>  | G   | C   | 0.01     | 0.2      | 0.04     |                        |            |            |                | 5 altered motifs  |                | 2 hits            | 2kb 3' of NARS   |                  |
| <a href="#">rs10559003</a> | CTT | C   | 0.12     | 0.24     | 0.08     |                        |            |            |                |                   |                | 1 hit             | 6.2kb 5' of NARS |                  |

Supplementary Table 6. Characteristics of replication cohorts

|                                                  | <b>ARIC</b>      | <b>CFS</b>       | <b>CFS</b>       | <b>CHS</b>       | <b>CHS</b>      | <b>FHS</b>       | <b>JHS</b>       | <b>MESA</b>      | <b>MESA</b>      | <b>MESA</b>      | <b>MrOS</b>      | <b>Starr</b>     |
|--------------------------------------------------|------------------|------------------|------------------|------------------|-----------------|------------------|------------------|------------------|------------------|------------------|------------------|------------------|
| Population                                       | EA               | AA               | EA               | AA               | EA              | EA               | AA               | AA               | HA               | EA               | EA               | HA               |
| N                                                | 1,432            | 731              | 710              | 185              | 731             | 640              | 496              | 490              | 458              | 707              | 2,178            | 782              |
| Male%                                            | 48%              | 43%              | 47%              | 39%              | 38%             | 47%              | 38%              | 45%              | 47%              | 47%              | 100%             | 28%              |
| Age, yrs, mean (SD)                              | 62.43<br>(5.69)  | 37.78<br>(19.46) | 41.55<br>(19.45) | 75.67<br>(4.7)   | 77.78<br>(4.33) | 58.82<br>(9.37)  | 63<br>(10.83)    | 69.15<br>(9.15)  | 68.64<br>(9.32)  | 68.94<br>(9.28)  | 76.67<br>(5.66)  | 52.34<br>(11.29) |
| BMI, kg/m <sup>2</sup> , mean (SD)               | 28.83<br>(5.13)  | 31.73<br>(9.89)  | 30.24<br>(8.66)  | 28.71<br>(4.86)  | 27.16<br>(4.43) | 27.85<br>(5.09)  | 32.44<br>(7.49)  | 30.47<br>(5.7)   | 30.1<br>(5.54)   | 28.07<br>(5.37)  | 27.22<br>(3.74)  | 32.15<br>(6.78)  |
| AHI, events/h, mean (SD)                         | 14.13<br>(15.48) | 17.52<br>(26.43) | 16.32<br>(24.2)  | 15.38<br>(14.91) | 15.3<br>(15.14) | 12.94<br>(14.67) | 15.39<br>(15.57) | 20.09<br>(19.85) | 21.99<br>(18.78) | 18.69<br>(18.05) | 17.32<br>(15.49) | 15.75<br>(17.07) |
| Average SaO <sub>2</sub> , %, mean (SD)          | 94.47<br>(1.99)  | 94.58<br>(3.77)  | 93.74<br>(3.66)  | 95.01<br>(2.07)  | 94.14<br>(1.9)  | 94.68<br>(1.96)  | 94.73<br>(2.06)  | 94.44<br>(1.96)  | 94.33<br>(1.56)  | 93.93<br>(1.75)  | 93.85<br>(1.73)  | 94.65<br>(2.09)  |
| Percentage time SaO <sub>2</sub> <90%, mean (SD) | 3.4<br>(10.35)   | 4.85<br>(13.87)  | 4.42<br>(12.68)  | 3.08<br>(8.64)   | 4.42<br>(12.17) | 2.87<br>(8.48)   | 3.17<br>(9.15)   | 4.01<br>(9.46)   | 3.83<br>(7.35)   | 4.36<br>(10.83)  | 4.42<br>(9.93)   | 2.83<br>(8.79)   |
| Average event duration, s, mean (SD)             | 23.71<br>(6.55)  | 20.3<br>(5.5)    | 20.57<br>(6.12)  | 20.97<br>(4.7)   | 21.4<br>(4.88)  | 24.07<br>(6.26)  | 18.49<br>(3.79)  | 19.73<br>(4.84)  | 21.2<br>(5.92)   | 21.63<br>(5.52)  | 26.87<br>(6.86)  | NA               |



Supplementary Table 7. Replication analysis of lead SNPs in independent cohorts.

| SNP        | A1/A2 | TRAIT                 | AA     |         |           |      | EA     |         |           |      | HA     |         |           |      |
|------------|-------|-----------------------|--------|---------|-----------|------|--------|---------|-----------|------|--------|---------|-----------|------|
|            |       |                       | Effect | P-value | Direction | N    | Effect | P-value | Direction | N    | Effect | P-value | Direction | N    |
| rs6750391  | T/C   | AHI                   | 0.018  | 0.539   | +++       | 1935 | -0.045 | 0.257   | ++++      | 6490 | -0.051 | 0.473   | --        | 1240 |
| rs74021948 | A/C   | Duration              | -0.004 | 0.479   | +++       | 1606 |        |         |           |      |        |         |           |      |
| rs12935339 | G/A   | Duration              | -0.003 | 0.696   | ---       | 1606 | 0.227  | 0.079   | +++++     | 6066 | 0.004  | 0.257   | +?        | 454  |
| rs34398460 | T/TA  | Duration              | 0.006  | 0.522   | +??       | 690  |        |         |           |      |        |         |           |      |
| rs11647443 | A/G   | Duration              | 0.004  | 0.639   | +++       | 1606 | 0.232  | 0.076   | +++++     | 6066 | 0.003  | 0.432   | +?        | 454  |
| rs57403733 | A/G   | AHI                   | 0.126  | 0.381   | +++       | 1935 | 0.015  | 0.777   | ++?+-     | 5727 | -0.026 | 0.571   | --        | 1240 |
|            |       | SaO <sub>2</sub> <90% | -0.079 | 0.533   | +++       | 1935 | 0.012  | 0.836   | ++?+-     | 5272 | -0.052 | 0.272   | --        | 1240 |
| rs388644   | A/C   | AHI                   | 0.006  | 0.880   | +++       | 1935 | 0.026  | 0.511   | ?++++     | 5027 | -0.029 | 0.503   | --        | 1240 |
|            |       | SaO <sub>2</sub> <90% | 0.011  | 0.793   | ---       | 1935 | 0.077  | 0.050   | ?++++     | 5027 | -0.065 | 0.141   | --        | 1240 |
| rs72627250 | T/C   | AHI                   | 0.081  | 0.438   | +++       | 1935 | -0.052 | 0.130   | -----     | 6490 | 0.032  | 0.469   | ++        | 1240 |
|            |       | SaO <sub>2</sub> <90% | 0.157  | 0.147   | +++       | 1935 | -0.109 | 0.002   | -----     | 6490 | 0.043  | 0.355   | ++        | 1240 |
| rs3745063  | C/T   | AHI                   | 0.078  | 0.450   | +++       | 1935 | -0.048 | 0.164   | -----     | 6490 | 0.029  | 0.509   | ++        | 1240 |
|            |       | SaO <sub>2</sub> <90% | 0.163  | 0.129   | +++       | 1935 | -0.110 | 0.002   | -----     | 6490 | 0.042  | 0.361   | ++        | 1240 |
| rs388644   | A/T   | AHI                   | 0.005  | 0.969   | -+?+      | 1427 | -0.031 | 0.443   | ?-----    | 5027 | 0.029  | 0.509   | ++        | 1240 |
|            |       | SaO <sub>2</sub> <90% | 0.101  | 0.438   | -+?+      | 1427 | -0.081 | 0.042   | ?-----    | 5027 | 0.042  | 0.360   | ++        | 1240 |
| rs56687381 | AG/A  | AHI                   | 0.056  | 0.252   | ++++      | 1935 | -0.046 | 0.176   | -----     | 6490 | 0.043  | 0.318   | ++        | 1240 |
|            |       | SaO <sub>2</sub> <90% | 0.069  | 0.181   | +++       | 1935 | -0.069 | 0.075   | -----     | 6490 | 0.035  | 0.427   | ++        | 1240 |

|            |     |                       |        |       |       |      |        |       |       |      |        |       |    |      |
|------------|-----|-----------------------|--------|-------|-------|------|--------|-------|-------|------|--------|-------|----|------|
| rs12458303 | C/A | AHI                   | 0.058  | 0.570 | ----+ | 1935 | -0.054 | 0.117 | ----- | 6490 | 0.031  | 0.488 | ++ | 1240 |
|            |     | SaO <sub>2</sub> <90% | 0.144  | 0.172 | ----+ | 1935 | -0.107 | 0.002 | ----- | 6490 | 0.043  | 0.351 | ++ | 1240 |
| rs72627251 | T/C | AHI                   | 0.059  | 0.233 | ++++  | 1935 | -0.045 | 0.189 | ----- | 6490 | 0.043  | 0.320 | ++ | 1240 |
|            |     | SaO <sub>2</sub> <90% | 0.067  | 0.190 | +++   | 1935 | -0.097 | 0.004 | ----- | 6490 | 0.035  | 0.431 | ++ | 1240 |
| rs59479795 | C/G | AHI                   | 0.076  | 0.464 | ----+ | 1935 | -0.053 | 0.129 | ----- | 6490 | 0.030  | 0.499 | ++ | 1240 |
|            |     | SaO <sub>2</sub> <90% | 0.163  | 0.128 | ----+ | 1935 | -0.105 | 0.003 | ----- | 6490 | 0.043  | 0.348 | ++ | 1240 |
| rs72627253 | A/T | AHI                   | 0.037  | 0.708 | ----+ | 1935 | -0.056 | 0.110 | ----- | 6490 | 0.029  | 0.515 | ++ | 1240 |
|            |     | SaO <sub>2</sub> <90% | 0.118  | 0.255 | ----+ | 1935 | -0.104 | 0.003 | ----- | 6490 | 0.044  | 0.336 | ++ | 1240 |
| rs28555130 | C/G | AHI                   | 0.058  | 0.236 | ++++  | 1935 | -0.045 | 0.186 | ----- | 6490 | 0.043  | 0.318 | ++ | 1240 |
|            |     | SaO <sub>2</sub> <90% | 0.068  | 0.186 | ----+ | 1935 | -0.096 | 0.005 | ----- | 6490 | 0.035  | 0.429 | ++ | 1240 |
| rs12454523 | T/C | AHI                   | -0.075 | 0.472 | +++   | 1935 | 0.053  | 0.123 | +++++ | 6490 | -0.030 | 0.494 | -- | 1240 |
|            |     | SaO <sub>2</sub> <90% | -0.164 | 0.127 | +++   | 1935 | 0.104  | 0.003 | +++++ | 6490 | -0.043 | 0.342 | -- | 1240 |
| rs12454416 | G/A | AHI                   | 0.074  | 0.472 | ----+ | 1935 | -0.054 | 0.120 | ----- | 6490 | 0.030  | 0.493 | ++ | 1240 |
|            |     | SaO <sub>2</sub> <90% | 0.164  | 0.127 | ----+ | 1935 | -0.103 | 0.003 | ----- | 6490 | 0.044  | 0.341 | ++ | 1240 |
| rs72627252 | A/G | AHI                   | 0.081  | 0.433 | ----+ | 1935 | -0.057 | 0.100 | ----- | 6490 | 0.030  | 0.502 | ++ | 1240 |
|            |     | SaO <sub>2</sub> <90% | 0.164  | 0.126 | ----+ | 1935 | -0.104 | 0.003 | ----- | 6490 | 0.042  | 0.364 | ++ | 1240 |
| rs2272783  | A/G | AHI                   | -0.189 | 0.144 | --?-  | 1427 | -0.019 | 0.637 | --?++ | 5727 | -0.002 | 0.966 | -+ | 1240 |
|            |     | SaO <sub>2</sub> <90% | 0.007  | 0.951 | --?-  | 1427 | -0.037 | 0.336 | --?++ | 5727 | 0.031  | 0.495 | ++ | 1240 |
| rs78641697 | A/C | AHI                   | -0.196 | 0.193 | --?-  | 1427 | 0.001  | 0.991 | --?++ | 5727 | 0.024  | 0.592 | ++ | 1240 |

|            |       |                       |        |       |      |      |        |       |        |      |        |       |    |      |
|------------|-------|-----------------------|--------|-------|------|------|--------|-------|--------|------|--------|-------|----|------|
|            |       | SaO <sub>2</sub> <90% | 0.010  | 0.938 | --?- | 1427 | -0.031 | 0.608 | --?-++ | 5727 | 0.051  | 0.279 | ++ | 1240 |
| rs72627249 | T/C   | AHI                   | -0.152 | 0.276 | --?- | 1427 | -0.018 | 0.728 | --?-++ | 5727 | 0.025  | 0.582 | ++ | 1240 |
|            |       | SaO <sub>2</sub> <90% | 0.055  | 0.658 | --?- | 1427 | 0.026  | 0.610 | --?+++ | 5727 | 0.047  | 0.314 | ++ | 1240 |
| rs8095804  | C/G   | AHI                   | 0.044  | 0.321 | +++  | 1935 | -0.045 | 0.181 | ----++ | 6490 | 0.051  | 0.232 | ++ | 1240 |
|            |       | SaO <sub>2</sub> <90% | 0.022  | 0.644 | +++  | 1935 | -0.096 | 0.005 | ----+- | 6490 | 0.035  | 0.421 | ++ | 1240 |
| rs4940483  | C/G   | AHI                   | 0.152  | 0.275 | +?-+ | 1427 | 0.018  | 0.728 | ++?+-- | 5727 | -0.025 | 0.582 | -- | 1240 |
|            |       | SaO <sub>2</sub> <90% | -0.055 | 0.658 | +?-+ | 1427 | -0.026 | 0.609 | ++?+-- | 5727 | -0.047 | 0.314 | -- | 1240 |
| rs10559003 | CTT/C | AHI                   | 0.051  | 0.259 | +++  | 1935 | -0.049 | 0.150 | ----++ | 6490 | 0.049  | 0.252 | ++ | 1240 |
|            |       | SaO <sub>2</sub> <90% | 0.024  | 0.604 | +++  | 1935 | -0.064 | 0.104 | ----++ | 6490 | 0.034  | 0.436 | ++ | 1240 |

AHI: apnea hypopnea index

Duration: average respiratory event duration

SaO<sub>2</sub><90%: percentage time SaO<sub>2</sub><90%
